# Supplementary material for: Tuning valley degeneracy with band inversion
Source: Royal Society of Chemistry journal article supplement (doi:10.1039/d1ta08379a), 2021-12-16
Supplement: d1ta08379a1.pdf [file d1ta08379a1.pdf]

— **Supplementary Information** —

**Tuning Valley Degeneracy in Rock-Salt IV-VI Compounds  
with Band Inversion**

Michael Y. Toriyama,<sup>\*,†</sup> Madison K. Brod,<sup>†</sup> Lídia C. Gomes,<sup>‡</sup> Ferdaushi Alam Bipasha,<sup>‡</sup> Badih  
A. Assaf,<sup>¶</sup> Elif Ertekin,<sup>‡</sup> and G. Jeffrey Snyder<sup>†</sup>

<sup>†</sup>*Department of Materials Science and Engineering, Northwestern University, Evanston, IL 60208*

<sup>‡</sup>*Department of Mechanical Science and Engineering, University of Illinois at Urbana-Champaign, Urbana,  
IL 61801*

<sup>¶</sup>*Department of Physics, University of Notre Dame, Notre Dame, IN 46556*

E-mail: MichaelToriyama2024@u.northwestern.edu

# Electronic Structures of IV-VI Compounds

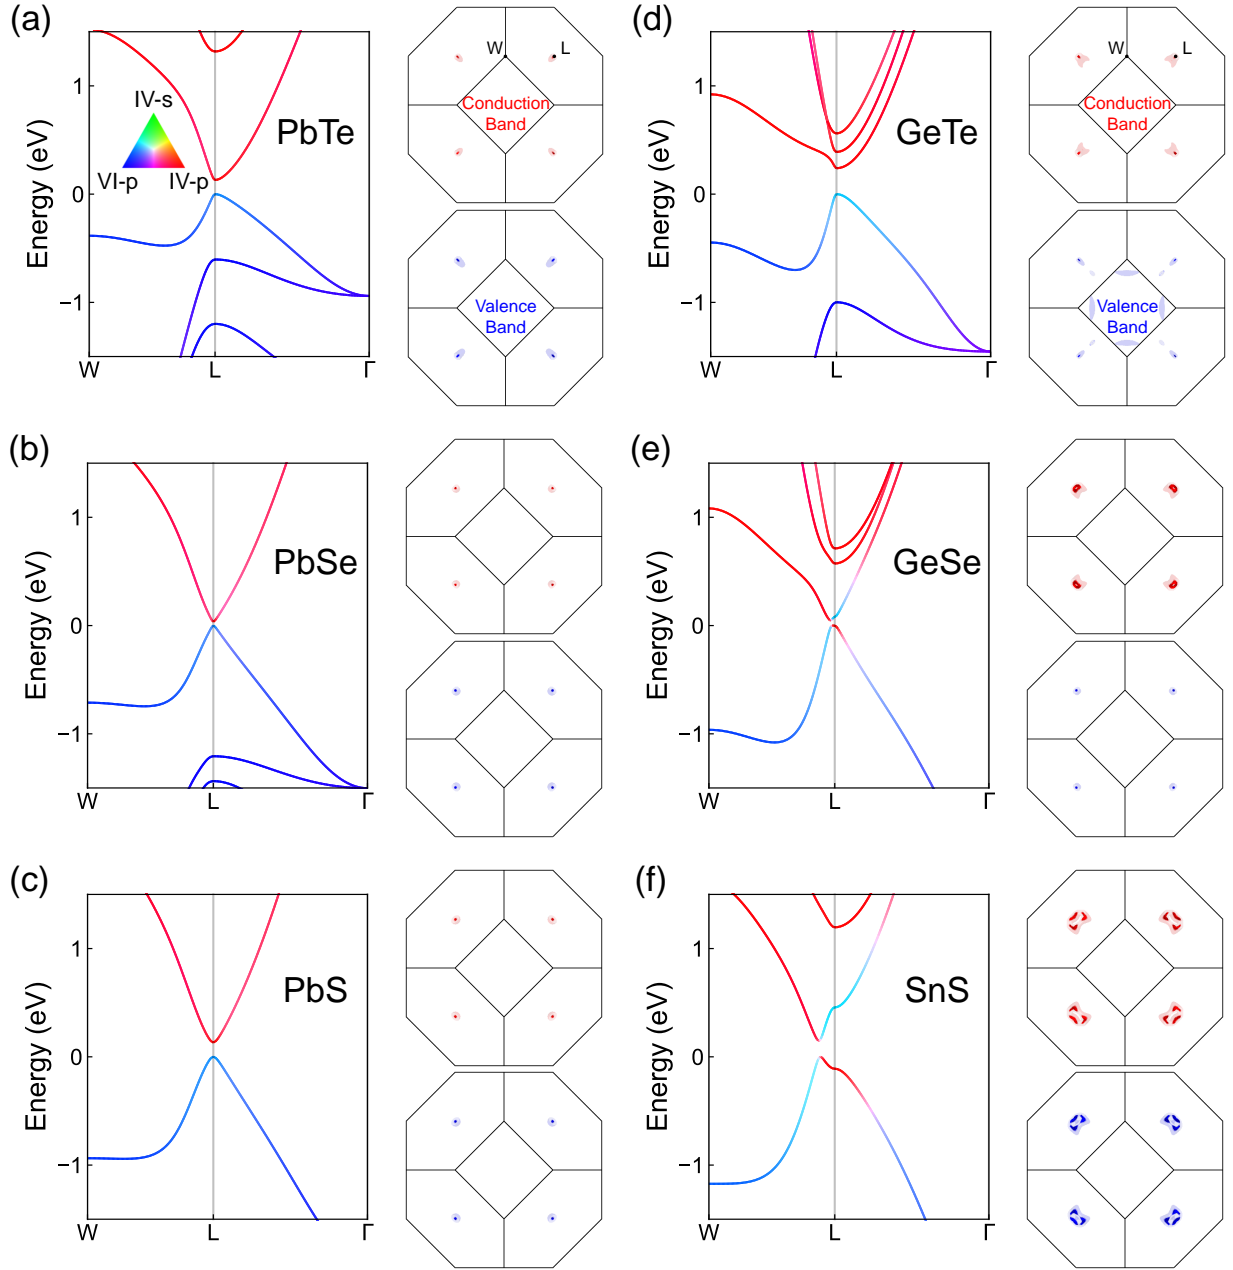

Figure S1: Electronic bands of rock-salt (a) PbTe, (b) PbSe, (c) PbS, (d) GeTe, (e) GeSe, and (f) SnS. The bands are color-coded by contributions from the IV-s (green), IV-p (red), and VI-p (blue) atomic orbitals. The full-zone Fermi surfaces of the conduction (red) and valence (blue) bands are shown. Darker Fermi surface colors represent a constant-energy slice 10 meV away from the band edge, whereas lighter colors represent a slice 100 meV away from the band edge.

## Close-Up View of the SnSe Fermi Surface

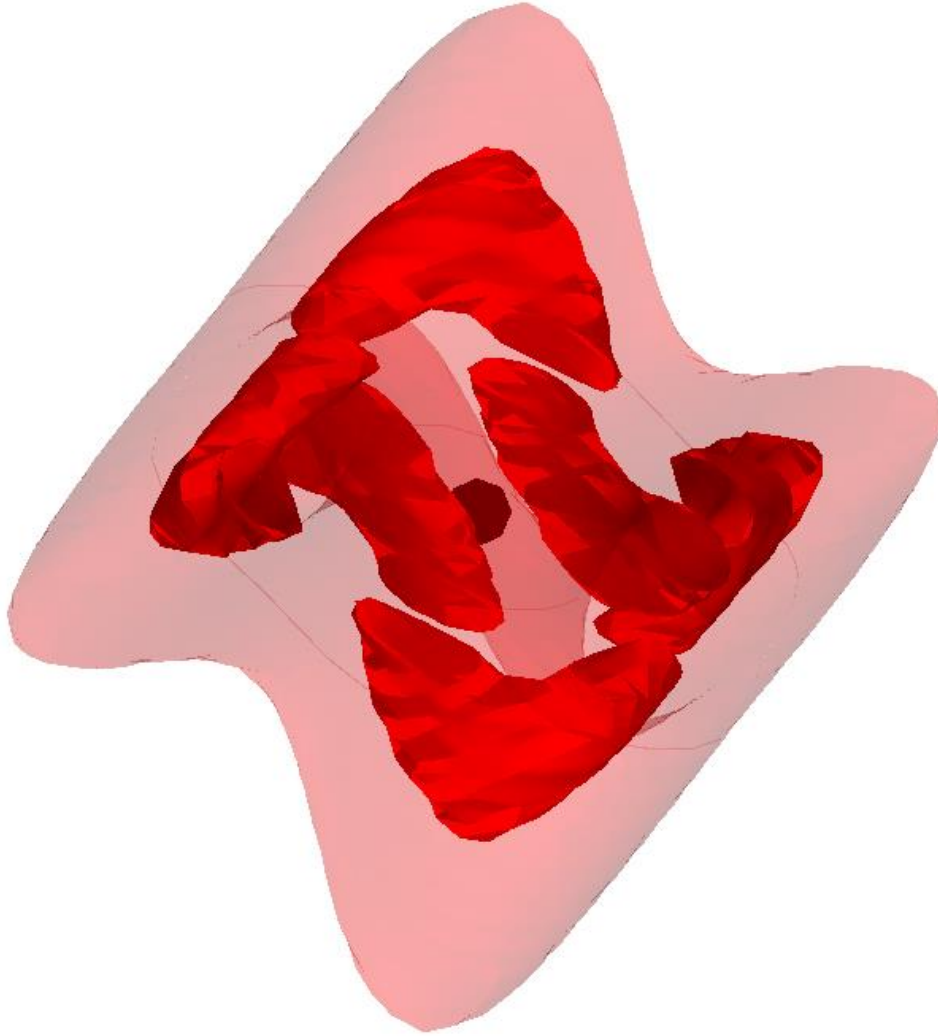

Figure S2: Fermi surface of SnSe around one of the L-points, shown as the black dot. The darker color represent a constant-energy slice 10 meV away from the band edge, whereas the lighter color represent a slice 100 meV away from the band edge.

## 12 Carrier Pockets from $\bar{3}m$ Symmetry

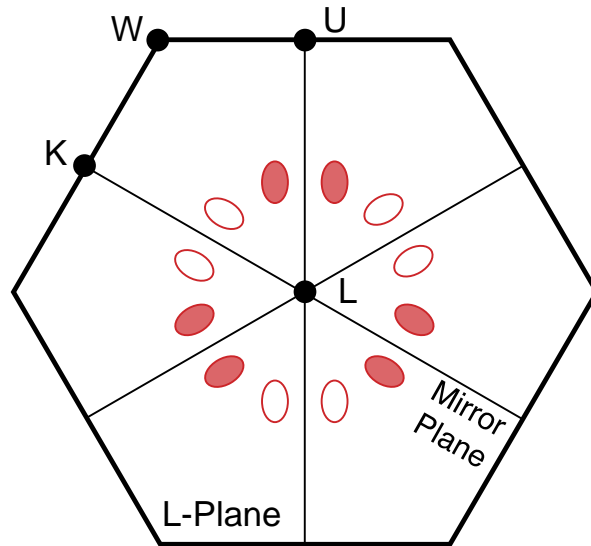

Figure S3: Twelve carrier pockets surrounding the L-point, which comply with the  $\bar{3}m$  symmetry of the L-point. The filled and unfilled carrier pockets are located on opposite sides of the L-plane. This arrangement is distinct from the six-carrier pocket case (Figure 4b) since the carrier pockets do not lie on the mirror planes, which are shown as solid lines passing through the L-point.
